# Supplementary material
Source: PubMed Central journal article supplement (PMC1129115)
Supplement: pnas_0502058102_2.pdf [file pnas_0502058102_2.pdf]

**Table 1. Databank accession codes for clathrin heavy chain sequences used in alignment**

| Common gene name           | DNA accession (NCBI or as noted)                                                                                                                                                                                                   | NCBI protein Accession | Genus            | Species             |
|----------------------------|------------------------------------------------------------------------------------------------------------------------------------------------------------------------------------------------------------------------------------|------------------------|------------------|---------------------|
| Human CLTC                 | G1705916                                                                                                                                                                                                                           | Q00610                 | <i>Homo</i>      | <i>sapiens</i>      |
| Macaque CLTC               | AB050403                                                                                                                                                                                                                           |                        | <i>Macaca</i>    | <i>fascicularis</i> |
| Cow CLTC                   | G1705915                                                                                                                                                                                                                           | P44951                 | <i>Bos</i>       | <i>taurus</i>       |
| Sheep CLTC                 | CO202599<br>CD288299                                                                                                                                                                                                               |                        | <i>Ovis</i>      | <i>aries</i>        |
| Pig CLTC                   | AJ659437<br>AJ681204<br>AJ747007<br>BP440225<br>BP446417<br>BP454934<br>BP461492<br>BP170030<br>BP438631<br>CK452480                                                                                                               | Ensembl:<br>F14522     | <i>Sus</i>       | <i>scrofa</i>       |
| Dog CLTC                   | AAEX01021795<br>Chr9_5.84                                                                                                                                                                                                          |                        | <i>Canis</i>     | <i>familiaris</i>   |
| Mouse CLTC                 | Embl: AL592222.9<br>NCBI contig NT_031414 and<br>NW_000039<br>RP23-366M19<br>3110065L21                                                                                                                                            |                        | <i>Mus</i>       | <i>musculus</i>     |
| Rat CLTC                   | G116514<br>Rn10_1856                                                                                                                                                                                                               | P11442                 | <i>Rattus</i>    | <i>norvegicus</i>   |
| Chicken CLTC               | Chr19_290.1, GGA427965                                                                                                                                                                                                             | CAD20886               | <i>Gallus</i>    | <i>gallus</i>       |
| African clawed frog CLTC   | BM262925<br>BG814098<br>158293760<br>158309305<br>158340516<br>158344024<br>173042789<br>271621027<br>283136695<br>286851001<br>341750939<br>341822960<br>scaffold_24494 JGI v.1<br>scaffold_42117 JGI v.1<br>scaffold_607 JGI v.2 |                        | <i>Xenopus</i>   | <i>laevis</i>       |
| Atlantic salmon CLTC       | BG934815                                                                                                                                                                                                                           |                        | <i>Salmo</i>     | <i>salar</i>        |
| Zebrafish A                | CR392341.2<br>Zv4_Scaffold 897 (chr10)<br>DART0000014065                                                                                                                                                                           |                        | <i>Danio</i>     | <i>rerio</i>        |
| Zebrafish B                | Zv4NA_Scaffold 6663<br>Sanger supercontig z06s013284<br>DART0000030858                                                                                                                                                             |                        | <i>Danio</i>     | <i>rerio</i>        |
| Japanese Pufferfish CLTC   | FRUP00000157850<br>Scaffold 621 v.3<br>Scaffold 1045 v. 3                                                                                                                                                                          |                        | <i>Takifugu</i>  | <i>rubripes</i>     |
| Indonesian pufferfish CLTC | FS_CONTIG_306_3<br>FS_CONTIG_30_1<br>FS_CONTIG_48613_1                                                                                                                                                                             |                        | <i>Tetraodon</i> | <i>nigroviridis</i> |
| Human CLTD                 | G2506298                                                                                                                                                                                                                           | P53675                 | <i>Homo</i>      | <i>sapiens</i>      |

|                              |                                                                                                                            |           |                           |                     |
|------------------------------|----------------------------------------------------------------------------------------------------------------------------|-----------|---------------------------|---------------------|
| Dog CLTD                     | BI397488<br>AAEX01043190<br>AAEX01043192<br>AAEX01043188<br>AAEX01043191<br>AAEX01043189<br>AAEX01046231<br>Chr26_6.165    |           | <i>Canis</i>              | <i>familiaris</i>   |
| Chicken CLTD                 | Chr15_5.1<br>603984283F1<br>603485646F1<br>603788828F1<br>603747580F1<br>047368.1<br>021350.1<br>BQ038996                  |           | <i>Gallus</i>             | <i>gallus</i>       |
| African clawed frog CLTD     | BG892745<br>BG578994<br>BG885812<br>158287710<br>scaffold_10796 JGI v.1<br>scaffold_13235 JGI v.1<br>scaffold_1315 JGI v.2 |           | <i>Xenopus</i>            | <i>laevis</i>       |
| Zebrafish C                  | Zv4_Scaffold 1944.1 (chr 23)                                                                                               |           | <i>Danio</i>              | <i>rerio</i>        |
| Zebrafish D                  | Zv4_Scaffold 799.17 (chr9)<br>Zv4_Scaffold 782 (chr9)<br>DART0000017022                                                    |           | <i>Danio</i>              | <i>rerio</i>        |
| Zebrafish E                  | DART0000027344<br>Zv4_scaffold 944 (chr11)                                                                                 |           | <i>Danio</i>              | <i>rerio</i>        |
| Japanese Pufferfish CLTD     | FRUP00000149307<br>Scaffold 385,<br>Scaffold 318                                                                           |           | <i>Takifugu</i>           | <i>rubripes</i>     |
| Indonesian pufferfish CLTD   | FS_CONTIG_5247_1<br>FS_CONTIG_23898_1<br>FS_CONTIG_5579_1                                                                  |           | <i>Tetraodon</i>          | <i>nigroviridis</i> |
| Sea squirt CHC               | Ci0100133226<br>LQW104187.x1                                                                                               |           | <i>Ciona</i>              | <i>intestinalis</i> |
| Sea urchin CHC               | CD307137<br>CD304867<br>CD306462<br>CD331757<br>CD312494<br>CD310379<br>BG785853<br>CD341260<br>CD305608<br>CD308619       |           | <i>Strongylocentrotus</i> | <i>purpuratus</i>   |
| Fruit Fly CHC                | NM_057694.2                                                                                                                | NP_477042 | <i>Drosophila</i>         | <i>melanogaster</i> |
| Mosquito CHC                 | AY009101                                                                                                                   | AAK12626  | <i>Aedes</i>              | <i>aegyptii</i>     |
| African malaria mosquito CHC | AAAB01008859.1                                                                                                             | EEA08110  | <i>Anopheles</i>          | <i>gambiae</i>      |
| Honeybee CHC                 | AADG02017589.1<br>AADG02021048.1                                                                                           |           | <i>Apis</i>               | <i>mellifera</i>    |
| Roundworm CHC                | NM_066859.1                                                                                                                | NP_499260 | <i>Caenorhabditis</i>     | <i>elegans</i>      |
| Roundworm CHC                | AC084685.1<br>ENSCBRP00000008041<br>MM14H7<br>11095131                                                                     |           | <i>Caenorhabditis</i>     | <i>briggsae</i>     |
| Parasitic worm CHC           | TIGR_6279<br>194346 189088<br>214282 189086<br>194672 201727                                                               |           | <i>Brugia</i>             | <i>malayi</i>       |
| Parasitic worm               | BG227621                                                                                                                   |           | <i>Strongyloides</i>      | <i>stercoralis</i>  |

|                           |                                                                                                                                 |                       |                            |                     |
|---------------------------|---------------------------------------------------------------------------------------------------------------------------------|-----------------------|----------------------------|---------------------|
| Loblolly pine CHC         | AW010935                                                                                                                        |                       | <i>Pinus</i>               | <i>taeda</i>        |
| Tomato CHC                | BG127598                                                                                                                        |                       | <i>Lycopersicon</i>        | <i>esculentum</i>   |
| Sugar beet CHC            | BI096310<br>BQ489421<br>BQ594159                                                                                                |                       | <i>Beta</i>                | <i>vulgaris</i>     |
| Iceplant CHC              | BE037308                                                                                                                        |                       | <i>Mesembryanthemum</i>    | <i>crystallinum</i> |
| Tree cotton CHC           | AI731103<br>BG443262<br>CA991331                                                                                                |                       | <i>Gossypium</i>           | <i>arboreum</i>     |
| Thale cress CHC1          | NM_111950.1<br>AC012562.5<br>AY094397                                                                                           | NP_187724<br>AAG51341 | <i>Arabidopsis</i>         | <i>thaliana</i>     |
| Thale cress CHC2          | NM_111688.1                                                                                                                     | NP_187466             | <i>Arabidopsis</i>         | <i>thaliana</i>     |
| Barrel medic CHC          | BQ140972<br>BI265895<br>MTtuc02-12-15.11958<br>MTtuc02-12-15.9453<br>AW689178<br>CA991331<br>AG137552<br>BH739319               |                       | <i>Medicago</i>            | <i>truncatula</i>   |
| Japanese Lotus Flower CHC | AP004467<br>17736834<br>Ljt06K11                                                                                                |                       | <i>Lotus</i>               | <i>japonicus</i>    |
| Soybean CHC               | G7441347                                                                                                                        | T06779                | <i>Glycine</i>             | <i>max</i>          |
| European aspen CHC        | BU894962<br>BU810505<br>BU895942                                                                                                |                       | <i>Populus</i>             | <i>tremula</i>      |
| Wild barley CHC           | CA030159<br>CA022613<br>HVtuc02-11-10.12031<br>HVtuc02-11-10.8717<br>BU994164                                                   |                       | <i>Hordeum</i>             | <i>vulgare</i>      |
| Bread wheat CHC           | CA726748<br>CA734056<br>BE515818<br>BJ316154<br>BQ905469<br>TAtuc-02-12-22.22669<br>TAtuc-02-12-22.11721<br>TAtuc-02-12-22.9539 |                       | <i>Triticum</i>            | <i>aestivum</i>     |
| Broomcorn CHC             | SBtuc-02-10-21.5120                                                                                                             |                       | <i>Sorghum</i>             | <i>bicolor</i>      |
| Rice CHC                  | CA756890<br>CA757329<br>D22409<br>BX000501<br>BX000491<br>OSTuc-02-10-21.5570                                                   |                       | <i>Oryza</i>               | <i>sativa</i>       |
| Corn CHC                  | AY103752<br>AW053034<br>BM318825<br>BH882780<br>BZ413705<br>CA399753<br>BZ405349<br>PCO092520                                   | -                     | <i>Zea</i>                 | <i>mays</i>         |
| Slime mold CHC            | 167687                                                                                                                          | P25870                | <i>Dictyostelium</i>       | <i>discoideum</i>   |
| Fission Yeast CHC         | NC_003424.1                                                                                                                     | NP_594148             | <i>Schizosaccharomyces</i> | <i>pombe</i>        |
| Baker's Yeast CHC         | G116515                                                                                                                         | P22137                | <i>Saccharomyces</i>       | <i>cerevisiae</i>   |
| Thrush CHC                | Contig6-2026<br>SDSTC_5476                                                                                                      |                       | <i>Candida</i>             | <i>albicans</i>     |
