# Supplementary material
Source: PubMed Central journal article supplement (PMC1129115)
Supplement: pnas_0502058102_3.pdf [file pnas_0502058102_3.pdf]

**Table 2. Databank accession codes for clathrin light chain sequences used in alignment**

| Common gene name           | DNA accession (NCBI or as noted)                                                                                               | NCBI protein accession | Genus            | Species             |
|----------------------------|--------------------------------------------------------------------------------------------------------------------------------|------------------------|------------------|---------------------|
| Human CLTA                 | M20471                                                                                                                         | P09496                 | <i>Homo</i>      | <i>sapiens</i>      |
| Human LCps8 pseudogene     | NT_015280                                                                                                                      |                        | <i>Homo</i>      | <i>sapiens</i>      |
| Human LCps12 pseudogene    | NT_024397                                                                                                                      |                        | <i>Homo</i>      | <i>sapiens</i>      |
| Chimpanzee CLTA            | Chr11_2.397                                                                                                                    |                        | <i>Pan</i>       | <i>trogodytes</i>   |
| Rhesus macaque monkey CLTA | CB552545                                                                                                                       |                        | <i>Macaca</i>    | <i>mulatta</i>      |
| Dog CLTA                   | Chr11_11.16                                                                                                                    |                        | <i>Canis</i>     | <i>familiaris</i>   |
| Cow CLTA                   | X04849                                                                                                                         | P04973                 | <i>Bos</i>       | <i>taurus</i>       |
| Sheep CLTA                 | CD289040<br>CD288853                                                                                                           |                        | <i>Ovis</i>      | <i>aries</i>        |
| Pig CLTA                   | BP464621<br>BX669382                                                                                                           |                        | <i>Sus</i>       | <i>scrofa</i>       |
| Rat CLTA                   | M19260                                                                                                                         | P08081                 | <i>Rattus</i>    | <i>norvegicus</i>   |
| Mouse CLTA                 | U91848<br>O08585<br>NM_016760.1                                                                                                | O08585                 | <i>Mus</i>       | <i>musculus</i>     |
| Chicken CLTA               | 356441.5<br>356441.4<br>336571.3                                                                                               |                        | <i>Gallus</i>    | <i>gallus</i>       |
| Frog CLTA                  | BG814584<br>BG885389<br>BG813947<br>BG611814                                                                                   |                        | <i>Xenopus</i>   | <i>laevis</i>       |
| Japanese Pufferfish CLTA   | CAAB01001172                                                                                                                   |                        | <i>Takifugu</i>  | <i>rubripes</i>     |
| Indonesian pufferfish CLTA | FS_CONTIG_39466_1<br>WI_TRUECONTIG_45364_1<br>FS_CONTIG_18411_2                                                                |                        | <i>Tetraodon</i> | <i>nigroviridis</i> |
| Zebrafish CLTA             | CA975665<br>BC060939<br>Zv4_Scaffold 19.2 (chr 1)                                                                              |                        | <i>Danio</i>     | <i>rerio</i>        |
| Human CLTB                 | NM_007097                                                                                                                      | P09497                 | <i>Homo</i>      | <i>sapiens</i>      |
| Chimpanzee CLTB            | Chr4_14.9                                                                                                                      |                        | <i>Pan</i>       | <i>trogodytes</i>   |
| Dog CLTB                   | Chr4_8.35                                                                                                                      |                        | <i>Canis</i>     | <i>familiaris</i>   |
| Bovine CLTB                | X04852                                                                                                                         | P04975                 | <i>Bovine</i>    | <i>taurus</i>       |
| Pig CLTB                   | BP438058<br>CF360765                                                                                                           |                        | <i>Sus</i>       | <i>scrofa</i>       |
| Rat CLTB                   | M15883                                                                                                                         | P08082                 | <i>Rattus</i>    | <i>norvegicus</i>   |
| Mouse CLTB                 | AK009844.1                                                                                                                     | BAB26539.1             | <i>Mus</i>       | <i>musculus</i>     |
| Chicken CLTB               | BM490884                                                                                                                       |                        | <i>Gallus</i>    | <i>gallus</i>       |
| Frog CLTB                  | BF613534<br>BG515527<br>BE491314<br>AW767161<br>Ti 48049601                                                                    |                        | <i>Xenopus</i>   | <i>laevis</i>       |
| Japanese Pufferfish CLTB   | CAAB01001207                                                                                                                   |                        | <i>Takifugu</i>  | <i>rubripes</i>     |
| Indonesian pufferfish CLTB | FS_CONTIG_4309_1                                                                                                               |                        | <i>Tetraodon</i> | <i>nigroviridis</i> |
| Zebrafish CLTB             | Zfish41356-385B12.p1c<br>Z35724-a3423c10.p1c<br>Zfish35934-350a11.p1c<br>Zfish35935-271607.p1c<br>Zv4_Scaffold 1228.10 (chr14) |                        | <i>Danio</i>     | <i>rerio</i>        |

|                       |                                  |                        |                            |                     |
|-----------------------|----------------------------------|------------------------|----------------------------|---------------------|
| Sea squirt LC         | C10100148440<br>Scaffold 140     |                        | <i>Ciona</i>               | <i>intestinalis</i> |
| Sea urchin LC         | CD308302<br>CD319349             |                        | <i>Strongylocentrotus</i>  | <i>purpuratus</i>   |
| Sea Hare LC           | L14586                           | APLCLTLCA              | <i>Aplysia</i>             | <i>californica</i>  |
| Black tiger shrimp LC | AW600742                         |                        | <i>Penaeus</i>             | <i>monodon</i>      |
| Signal crayfish LC    | CF542657                         |                        | <i>Pacifastacus</i>        | <i>leniusculus</i>  |
| Scorpion LC           | CB333963<br>CB333964             |                        | <i>Mesobuthus</i>          | <i>gibbosus</i>     |
| Tobacco hornworm LC   | CA798861                         |                        | <i>Manduca</i>             | <i>sexta</i>        |
| Fruit Fly LC          | NM_079454                        | Q9VWA1                 | <i>Drosophila</i>          | <i>melanogaster</i> |
| Mosquito LC           | AAAB01008933.1                   | EAA09983               | <i>Anopheles</i>           | <i>gambiae</i>      |
| Honeybee LC           | XM_395065<br>XM_393705           | XP_395065<br>XP_393705 | <i>Apis</i>                | <i>mellifera</i>    |
| Humus earthworm LC    | CF799395                         |                        | <i>Lumbricus</i>           | <i>rubellus</i>     |
| Roundworm LC          | AAB37069                         | T29460                 | <i>Caenorhabditis</i>      | <i>elegans</i>      |
| Nematode LC           | CB277564                         |                        | <i>Trichuris</i>           | <i>vulpis</i>       |
| Nematode LC           | BQ692130<br>BG438479             |                        | <i>Trichinella</i>         | <i>spiralis</i>     |
| Worm LC               | BU800684<br>BU798239<br>BU791895 |                        | <i>Schistosoma</i>         | <i>japonicum</i>    |
| Nematode LC           | BE581044                         |                        | <i>Strongyloides</i>       | <i>stercoralis</i>  |
| Slime mold LC         | AC117081<br>167687               | AAM43766               | <i>Dictyostelium</i>       | <i>discoideum</i>   |
| Thale cress LC1       | NM_129564<br>AF002109            | NP_565921              | <i>Arabidopsis</i>         | <i>thaliana</i>     |
| Thale cress LC2       | AF049236                         | AAC14416               |                            |                     |
| Thale cress LC3       | AC006234                         | AAD20919               |                            |                     |
| Fission yeast LC      | NC_003423                        | NP_595750              | <i>Schizosaccharomyces</i> | <i>pombe</i>        |
| Baker's yeast LC      | NC_001139                        | NP_011683              | <i>Saccharomyces</i>       | <i>cerevisiae</i>   |
| Fungus LC             | AL807366.1                       | CAD36975               | <i>Neurospora</i>          | <i>crassa</i>       |
