# Supplementary material
Source: PubMed Central journal article supplement (PMC1129115)
Supplement: pnas_0502058102_4.pdf [file pnas_0502058102_4.pdf]

**Table 3. Accession codes for nearby paralogs included in trees**

| Common gene name*         | NCBI accession no.           | Genus             | Species              |
|---------------------------|------------------------------|-------------------|----------------------|
| <b>KIAA1100/RNF38</b>     |                              |                   |                      |
| <i>CG9381</i>             | NP_731366.1                  | <i>Drosophila</i> | <i>melanogaster</i>  |
| <i>ENSANGG00000023585</i> | XP_321787.1                  | <i>Anopheles</i>  | <i>gambiae</i>       |
| <i>Rnf44</i>              | BAA83052.2                   | <i>Homo</i>       | <i>sapiens</i>       |
| <i>KIAA1100</i>           | CAF94220.1                   | <i>Tetraodon</i>  | <i>nigroviridis</i>  |
| <i>LOC361212</i>          | XP_341495.1                  | <i>Rattus</i>     | <i>norvegicus</i>    |
| <i>LOC408543</i>          | XP_392089.1                  | <i>Apis</i>       | <i>mellifera</i>     |
| <i>Rnf44</i>              | BAC98100.1                   | <i>Mus</i>        | <i>musculus</i>      |
| <i>Oip1</i>               | AAH83548.1                   | <i>Rattus</i>     | <i>norvegicus</i>    |
| <i>RNF38</i>              | NP_073618.3                  | <i>Homo</i>       | <i>sapiens</i>       |
| <i>Rnf38</i>              | NP_780410.1                  | <i>Mus</i>        | <i>musculus</i>      |
| <i>TEgg056n21</i>         | CR760616.1                   | <i>Xenopus</i>    | <i>tropicalis</i>    |
| <i>TGas002p06</i>         | CR855669.1                   | <i>Xenopus</i>    | <i>tropicalis</i>    |
| <i>ENSDARG00000030070</i> | ENSDART00000048387 (ENSEMBL) | <i>Danio</i>      | <i>rerio</i>         |
| <i>ENSGALT00000024714</i> | ENSGALT00000024714 (ENSEMBL) | <i>Gallus</i> □   | <i>gallus</i>        |
| <i>SINFRUG00000154157</i> | SINFRUT00000164038 (ENSEMBL) | <i>Takifugu</i>   | <i>rubripes</i>      |
| <b>SEPTIN4/SEPTIN5</b>    |                              |                   |                      |
| <i>CG9699</i>             | NP_728007.1                  | <i>Drosophila</i> | <i>melanogaster</i>  |
| <i>ENSANGG00000014962</i> | XP_311306.1                  | <i>Anopheles</i>  | <i>gambiae</i>       |
| <i>GA21972</i>            | EAL31722.1                   | <i>Drosophila</i> | <i>pseudoobscura</i> |
| <i>Gp1bb</i>              | NP_446383.1                  | <i>Rattus</i>     | <i>norvegicus</i>    |
| <i>EG3RVC</i>             | XP_213413.2                  | <i>Rattus</i>     | <i>norvegicus</i>    |
| <i>LOC293507</i>          | XP_215071.2                  | <i>Rattus</i>     | <i>norvegicus</i>    |
| <i>LOC416778</i>          | XP_415072.1                  | <i>Gallus</i>     | <i>gallus</i>        |
| <i>Sep4</i>               | NP_035259.1                  | <i>Mus</i>        | <i>musculus</i>      |
| <i>Sept1</i>              | NP_059489.1                  | <i>Mus</i>        | <i>musculus</i>      |
| <i>SEPT1</i>              | NP_443070.1                  | <i>Homo</i>       | <i>sapiens</i>       |
| <i>SEPT4</i>              | CAF94531.1                   | <i>Tetraodon</i>  | <i>nigroviridis</i>  |
| <i>DKFZp459I029</i>       | CAH92543.1                   | <i>Pongo</i>      | <i>pygmaeus</i>      |
| <i>SEPT4</i>              | NP_004565.1                  | <i>Homo</i>       | <i>sapiens</i>       |
| <i>Sept5</i>              | AAH59848.1                   | <i>Mus</i>        | <i>musculus</i>      |
| <i>AB056419</i>           | BAB33077.1                   | <i>Macaca</i>     | <i>fascicularis</i>  |
| <i>SEPT5</i>              | NP_002679.2                  | <i>Homo</i>       | <i>sapiens</i>       |
| <i>zgc:100950</i>         | AAH78256.1                   | <i>Danio</i>      | <i>rerio</i>         |
| <i>zgc:73218</i>          | NP_956282.1                  | <i>Danio</i>      | <i>rerio</i>         |
| <b>MTMR3/MTMR4</b>        |                              |                   |                      |
| <i>22J3.6</i>             | CAD28129.1                   | <i>Anopheles</i>  | <i>gambiae</i>       |
| <i>CG3632</i>             | AAQ22540.1                   | <i>Drosophila</i> | <i>melanogaster</i>  |
| <i>LOC287607</i>          | XP_213426.2                  | <i>Rattus</i>     | <i>norvegicus</i>    |
| <i>LOC417014</i>          | XP_415304.1                  | <i>Gallus</i>     | <i>gallus</i>        |
| <i>LOC417472</i>          | XP_415720.1                  | <i>Gallus</i>     | <i>gallus</i>        |
| <i>Mtmr3</i>              | AAH81544.1                   | <i>Mus</i>        | <i>musculus</i>      |
| <i>Mtmr3</i>              | AAH87045.1                   | <i>Rattus</i>     | <i>norvegicus</i>    |
| <i>Mtmr3</i>              | CAG02483.1                   | <i>Tetraodon</i>  | <i>nigroviridis</i>  |
| <i>MTMR3</i>              | NP_066576.1                  | <i>Homo</i>       | <i>sapiens</i>       |
| <i>Mtmr3</i>              | AAH59312.1                   | <i>Xenopus</i>    | <i>laevis</i>        |
| <i>LOC494749</i>          | AAH82848.1                   | <i>Xenopus</i>    | <i>laevis</i>        |
| <i>Mtmr4</i>              | CAF98531.1                   | <i>Tetraodon</i>  | <i>nigroviridis</i>  |
| <i>MTMR4</i>              | NP_004678.2                  | <i>Homo</i>       | <i>sapiens</i>       |
| <i>Mtmr4</i>              | NP_573478.1                  | <i>Mus</i>        | <i>musculus</i>      |
| <i>mtmr4-prov</i>         | AAH45024.1                   | <i>Xenopus</i>    | <i>laevis</i>        |

\*Common name listed is the gene name (italicized) or an assigned name where no gene or clone name exist (non-italicized). Exceptions are clone names TEgg056n21, TGas002p06, cieg025p22, and TNeu103k13. Subheadings (bold) are protein names.

**FLJ20315/KIAA1133**

4732452J19Rik  
 CiGI  
 FLJ20315  
 AB051436  
 KIAA1133  
 KIAA1133  
 LOC303412  
 LOC416919  
 OTTMUSP00000005301

AAH75707.1  
 BAC22752.1  
 CAF98529.1  
 NP\_060233.3  
 BAB33319.1  
 CAG08175.1  
 XP\_220829.2  
 XP\_415210.1  
 CAI24933.1

*Mus musculus*  
*Ciona intestinalis*  
*Tetraodon nigroviridis*  
*Homo sapiens*  
*Homo sapiens*  
*Tetraodon nigroviridis*  
*Rattus norvegicus*  
*Gallus gallus*  
*Mus musculus*

**PPM1E/PPM1F**

CAAB01005306  
 CG10376  
 cieg025p22  
 GA10286  
 LOC417627  
 LOC468424  
 PPM1E  
 Ppm1e  
 Ppm1e  
 PPM1F  
 Ppm1f  
 Ppm1f  
 ENSDARG00000005786  
 ENSDARG00000026455

CAAB01005306  
 NP\_609899.1  
 AK114880  
 EAL33969.1  
 XP\_415871.1  
 XP\_523813.1  
 AAM76058.1  
 NP\_796141.2  
 NP\_942068.1  
 NP\_055449.1  
 NP\_786931.1  
 NP\_789803.1  
 ENSDART00000011896 (ENSEMBL)  
 ENSDART00000042581 (ENSEMBL)

*Takifugu rubripes*  
*Drosophila melanogaster*  
*Ciona intestinalis*  
*Drosophila pseudoobscura*  
*Gallus gallus*  
*Pan troglodytes*  
*Homo sapiens*  
*Mus musculus*  
*Rattus norvegicus*  
*Homo sapiens*  
*Rattus norvegicus*  
*Mus musculus*  
*Danio rerio*  
*Danio rerio*

**YPEL1/YPEL2**

DKFZp469J124  
 LOC408838  
 LOC416774  
 qdgl-1  
 RCJMB04\_31k2  
 TNeu103k13  
 YPEL1  
 Ypel1  
 YPEL1  
 ypel1-prov  
 YPEL2  
 E130113K08Rik  
 YPEL2  
 zgc:100954

CR857865.1  
 XM\_392369.1  
 XM\_415068.1  
 AF190625.1  
 AJ720977.1  
 CR760137.1  
 AB098735.1  
 AB098740.1  
 AB160977.1  
 BC077489.1  
 AB098736.1  
 AB098741.2  
 AB160978.1  
 BC079498.1

*Pongo pygmaeus*  
*Apis mellifera*  
*Gallus gallus*  
*Coturnix coturnix*  
*Gallus gallus*  
*Xenopus tropicalis*  
*Homo sapiens*  
*Mus musculus*  
*Cercopithecus aethiops*  
*Xenopus laevis*  
*Homo sapiens*  
*Mus musculus*  
*Cercopithecus aethiops*  
*Danio rerio*

**AP1B1/AP2B1**

AP1B1  
 Ap1b1  
 Ap1b1  
 Ap1b1  
 AP2B1  
 Ap2b1  
 Ap2b1  
 Ap2b1  
 Ap2b1  
 Ap2b1  
 Ap2b1-prov  
 CG12532  
 DKFZp469O1619  
 ENSANGG00000011397  
 GA11682  
 LOC417021  
 MGC75877  
 ENSGALG00000002140

NP\_001118.2  
 NP\_058973.1  
 BAC28603.1  
 CAG08478.1  
 CAH18240.1  
 AAH46772.1  
 M77246  
 AAH49138.1  
 CAF97314.1  
 AAH43793.1  
 NP\_523415.1  
 CAH92283.1  
 EAA01744.2  
 EAL31955.1  
 XP\_415311.1  
 AAH63350.1  
 ENSGALP0000003342 (ENSEMBL)

*Homo sapiens*  
*Rattus norvegicus*  
*Mus musculus*  
*Tetraodon nigroviridis*  
*Homo sapiens*  
*Mus musculus*  
*Rattus norvegicus*  
*Danio rerio*  
*Tetraodon nigroviridis*  
*Xenopus laevis*  
*Drosophila melanogaster*  
*Pongo pygmaeus*  
*Anopheles gambiae*  
*Drosophila pseudoobscura*  
*Gallus gallus*  
*Xenopus tropicalis*  
*Gallus gallus*
