# Supplementary material
Source: PubMed Central journal article supplement (PMC1129115)
Supplement: pnas_0502058102_5.pdf [file pnas_0502058102_5.pdf]

**Table 4. Residues predicted to be functionally divergent in clathrin heavy chain**

| <b>Residue no.<br/>(bovine CHC17)</b> | <b>In CHC17<br/>sequences</b> | <b>In CHC22<br/>sequences</b> | <b>Protein domain</b> |
|---------------------------------------|-------------------------------|-------------------------------|-----------------------|
| 139                                   | Conserved V                   | M, V, Q, or A                 | N-terminal domain     |
| 200                                   | S, G, or R                    | Conserved A                   | N-terminal domain     |
| 206                                   | Conserved M                   | I, V, S, or M                 | N-terminal domain     |
| 266                                   | I or V                        | I or V                        | N-terminal domain     |
| 370                                   | A, N, or T                    | Conserved T                   | Linker region         |
| 576                                   | S, T, or M                    | A or S                        | Distal leg segment    |
| 864                                   | A or S                        | Conserved S                   | Distal leg segment    |
| 1212                                  | D or E                        | D or E                        | Proximal leg segment  |
| 1382                                  | P, A or R                     | Conserved P                   | Proximal leg segment  |
| 1408                                  | I or V                        | Conserved L                   | Proximal leg segment  |
| 1440                                  | S or T                        | S, F, or T                    | Proximal leg segment  |
| 1473                                  | T, I, or S                    | Conserved E                   | Proximal leg segment  |
| 1494                                  | Conserved S                   | S, A, T, or G                 | Proximal leg segment  |
| 1555                                  | Q, S, or A                    | Conserved Q                   | Trimerization domain  |
| 1559                                  | Q, V, S, or D                 | Conserved E                   | Trimerization domain  |
| 1561                                  | E, N, or D                    | Conserved G                   | Trimerization domain  |
