# Supplementary material
Source: PubMed Central journal article supplement (PMC1129115)
Supplement: pnas_0502058102_9.pdf [file pnas_0502058102_9.pdf]

## Effect of the Urochordate-Vertebrate calibration (upper limit)

### MODEL 1: Calibration using data from Douzery et al, 2004: upper limit 95% cr. interval (657 MYA)

A. Calibration Urochordates-Vertebrates : 530-**660** MYA (595 +- 32.5 MYA)

⇒ CHC: 531 +- 20 MYA [496-574]

Urochordates-Vertebrates: 650 +- 27 MYA [600-705]

⇒ LC: 511 +- 23 MYA [470-561]

Urochordates-Vertebrates: 607 +-28 MYA [554-663]

B. “Corrected” calibration Urochordates-Vertebrates : **628.5 +- 1 MYA**

⇒ CHC: 520 +- 14 MYA [494-548]

Urochordates-Vertebrates: 629 +- 1 MYA [627-630]

⇒ LC: 520 +- 22 MYA [480-564]

Urochordates-Vertebrates: 628 +-1 MYA [627-630]

### MODEL 2: Calibration using a maximum of 900 MYA

A. Calibration Urochordates-Vertebrates : 530-**900** MYA (715 +- 92.5 MYA)

⇒ CHC: 596 +- 39 MYA [529-679]

Urochordates-Vertebrates: 776 +- 60 MYA [669-905]

⇒ LC: 542 +- 37 MYA [483-625]

Urochordates-Vertebrates: 684 +-62 MYA [578-819]

B. “Corrected” calibration Urochordates-Vertebrates : **730 +- 1 MYA**

⇒ CHC: 572 +- 20 MYA [535-611]

Urochordates-Vertebrates: 730 +- 1 MYA [728-732]

⇒ LC: 561 +- 30 MYA [506-624]

Urochordates-Vertebrates: 730 +-1 MYA [728-732]

⇒ CHC and LC duplications occurred 510-600 MYA (LC duplication, model 1 – CHC duplication, model 2). The interval between the two duplications did not exceed 11 million years (range: <1 [MODEL 1] - 11 [MODEL 2] million years).
