# Supplementary material
Source: PubMed Central journal article supplement (PMC1129115)
Supplement: pnas_0502058102_10.pdf [file pnas_0502058102_10.pdf]



| MOUSE STRAIN                            | EXON 28 PARTIAL SEQUENCE                                                                                                                            |
|-----------------------------------------|-----------------------------------------------------------------------------------------------------------------------------------------------------|
| C57BL/6J<br><i>M. musculus</i>          | AGTAGAGTGTCTCGGGACTTTGGGTTTGCTGCCTGGAGCACAAAATGGCCTGGAGGCAATTCTATGGACTTAGTTG<br>TATCCTATTTTCATCTAAGTGATAAGATGATGCCTAAAAAG                           |
| FVB/NJ<br><i>M. musculus</i>            | AGTAGAGTGTCTCGGGACTTTGGGTTTGCTGCCTGGAGCACAAAATGGCCTGGAGGCAATTCTATGGACTTAGTTG<br>TATCCTATTTTCATCTAAGTGATAAGATGATGCCTAAAAAG                           |
| A/J<br><i>M. musculus</i>               | AGTAGAGTGTCTCGGGACTTTGGGTTTGCTGCCTGGAGCACAAAATGGCCTGGAGGCAATTCTATGGACTTAGTTG<br>TATCCTATTTTCATCTAAGTGATAAGATGATGCCTAAAAAG                           |
| C3H/HeJ<br><i>M. musculus</i>           | AGTAGAGTGTCTCGGGACTTTGGGTTTGCTGCCTGGAGCACAAAATGGCCTGGAGGCAATTCTATGGACTTAGTTG<br>TATCCTATTTTCATCTAAGTGATAAGATGATGCCTAAAAAG                           |
| 129S1/SvImJ<br><i>M. musculus</i>       | AGTAGAGTGTCTCGGGACTTTGGGTTTGCTGCCTGGAGCACAAAATGGCCTGGAGGCAATTCTATGGACTTAGTTG<br>TATCCTATTTTCATCTAAGTGATAAGATGATGCCTAAAAAG                           |
| SJL/J<br><i>M. musculus</i>             | AGTAGAGTGTCTCGGGACTTTGGGTTTGCTGCCTGGAGCACAAAATGGCCTGGAGGCAATTCTATGGACTTAGTTG<br>TATCCTATTTTCATCTAAGTGATAAGATGATGCCTAAAAAG                           |
| CZECHII/EiJ<br><i>M. musculus</i>       | AGTAGAGTGTCTCGGGACTTTGGGTTTGCTGCCTGGAGCACAAAATGGCCTGGAGGCAATTCTATGGACTTAGTTG<br>TATCCTATTTTCATCTAAGTGATAAGATGATGCCTAAAAAG                           |
| BALB/cByJ<br><i>M. musculus</i>         | AGTAGAGTGTCTCGGGACTTTGGGTTTGCTGCCTGGAGCACAAAATGGCCTGGAGGCAATTCTATGGACTTAGTTG<br>TATCCTATTTTCATCTAAGTGATAAGATGATGCCTAAAAAG                           |
| DBA/2J<br><i>M. musculus</i>            | AGTAGAGTGTCTCGGGACTTTGGGTTTGCTGCCTGGAGCACAAAATGGCCTGGAGGCAATTCTATGGACTTAGTTG<br>TATCCTATTTTCATCTAAGTGATAAGATGATGCCTAAAAAG                           |
| BALB/cJ<br><i>M. musculus</i>           | AGTAGAGTGTCTCGGGACTTTGGGTTTGCTGCCTGGAGCACAAAATGGCCTGGAGGCAATTCTATGGACTTAGTTG<br>TATCCTATTTTCATCTAAGTGATAAGATGATGCCTAAAAAG                           |
| SPRET/Ei<br><i>M. spretus</i>           | AGTAGAGTGTCTCGGGACTTTGGGTTTGCTGCCTGGAGCACAAAATGGCCTGGAGGCAATTCTATGGGCTTAGTTG<br>TATCCTATTTTCATCTAAGTGATAAGATGATGCCTAAAAAG                           |
| Peru atteck<br><i>M. musculus</i>       | AGTAGAGTGTCTCGGGACTTTGGGTTTGCTGCCTGGAGCACAAAATGGCCTGGAGGCAATTCTATGGACTTAGTTG<br>TATCCTATTTTCATCTAAGTGATAAGATGATGCCTAAAAAG                           |
| MOLF/EiJ<br><i>M. m.<br/>molossinus</i> | AGTAGAGTGTCTCGGGACTTTGGGTTTGCTGCCTGGAGCACAAAATGGCCTGGAGGCAATTCTATGGACTTAGTTG<br>TATCCTATTTTCATCTAAGTGATAAGATGATGCCTAAAAAG                           |
| WSB/EiJ<br><i>M. domesticus</i>         | AGTAGAGTGTCTCGGGACTTTGGGTTTGCTGCCTGGAGCACAAAATGGCCTGGAGGCAATTCTATGGACTTAGTTG<br>TATCCTATTTTCATCTAAGTGATAAGATGATGCCTAAAAAG                           |
| PWK/PhJ<br><i>M. m. musculus</i>        | AGTAGAGTGTCTCGGGACTTTGGGTTTGCTGCCTGGAGCACAAAATGGCCTGGAGGCAATTCTATGGACTTAGTTG<br>TATCCTATTTTCATCTAAGTGATAAGATGATGCCTAAAAAG                           |
| CAST/Ei<br><i>M. m.<br/>castaneus</i>   | AGTAGAGTGTCTCGGGACTTTGGGTTTGCTGCCTGGAGCACAAAATGGCCTGGAGGCAATTCTATGGACTTAGTTG<br>TATCCTATTTTCATCTAAGTGATAAGATGATGCCTAAAAAG                           |
| HUMAN<br><i>H. sapiens</i>              | AGAGGGAGTGCTTCGCAGCTTGTCTCTTCACCTGCTATGACCTGCTTCGCCAGACATGGTGCCTTGAGCTGGCCTG<br>GAGGCACAACCTCGTGGACTTGGCCATGCCCTACTTCATCCAGGTGATGAGGGAGTACCTGAGCAAG |
