# Supplementary material
Source: PubMed Central journal article supplement (PMC1129115)

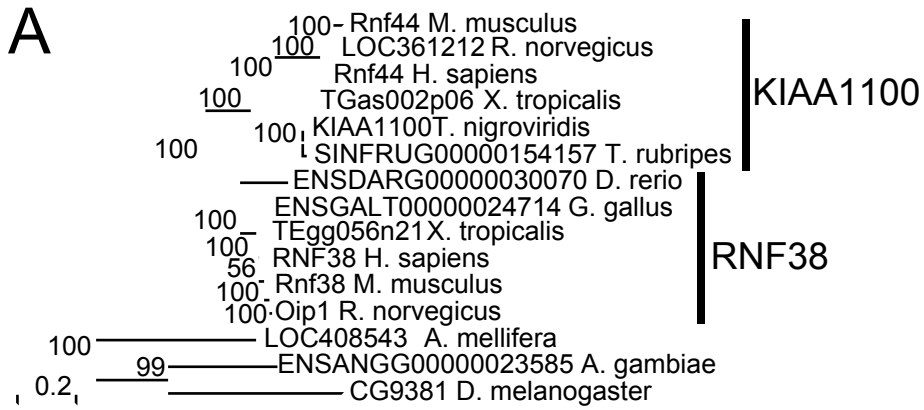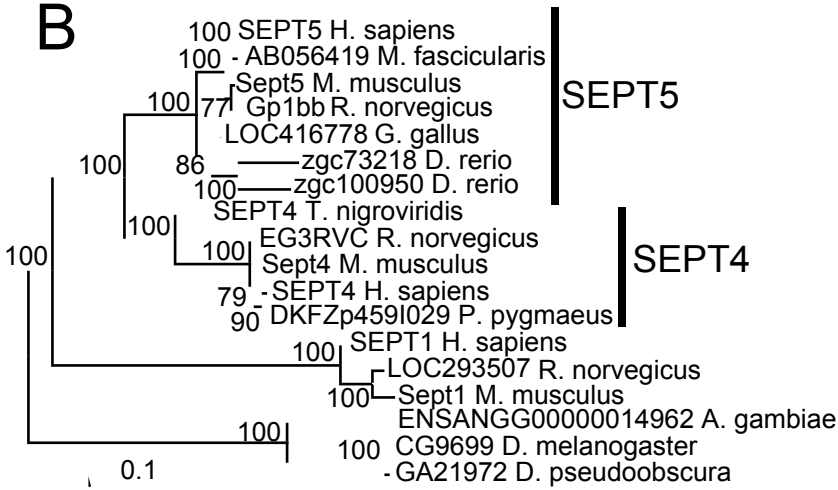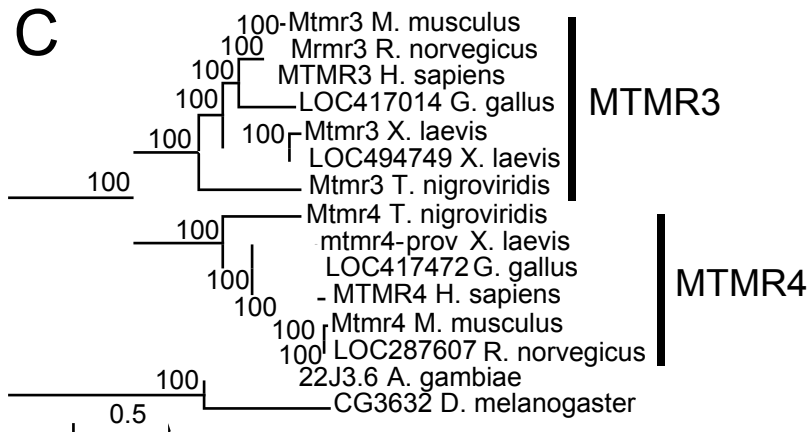

**D**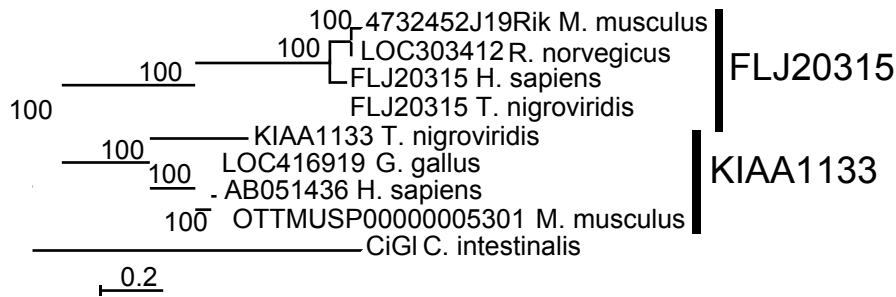**E**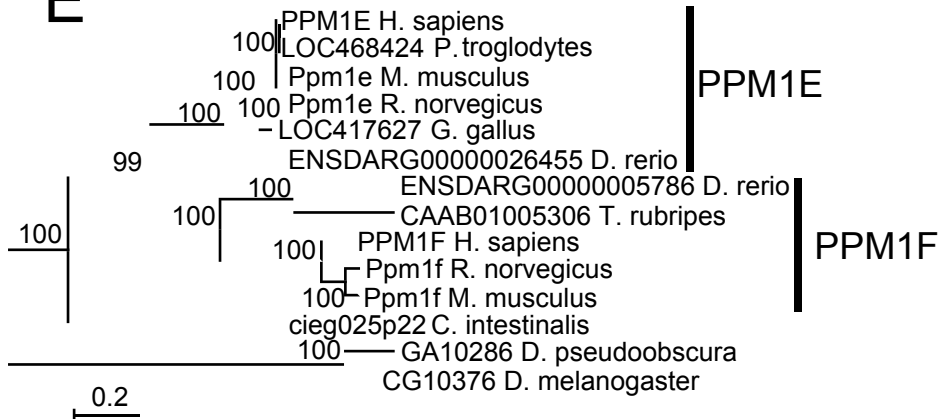**F**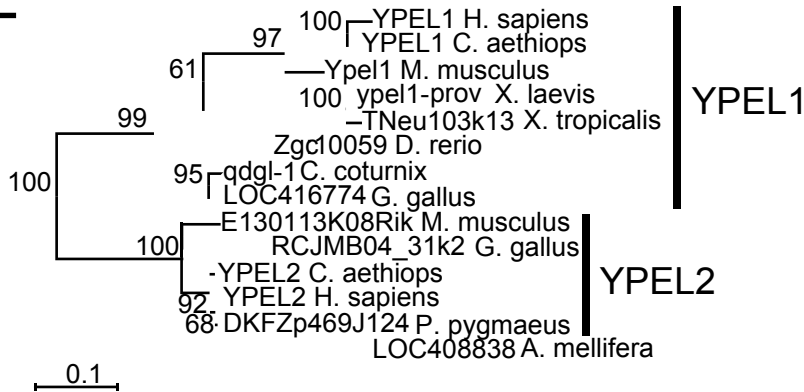**G**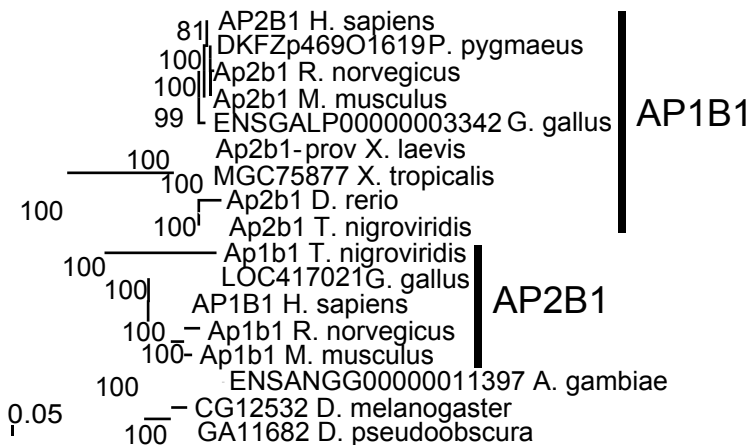

Supplement: pnas_0502058102_11.pdf [file pnas_0502058102_11.pdf]

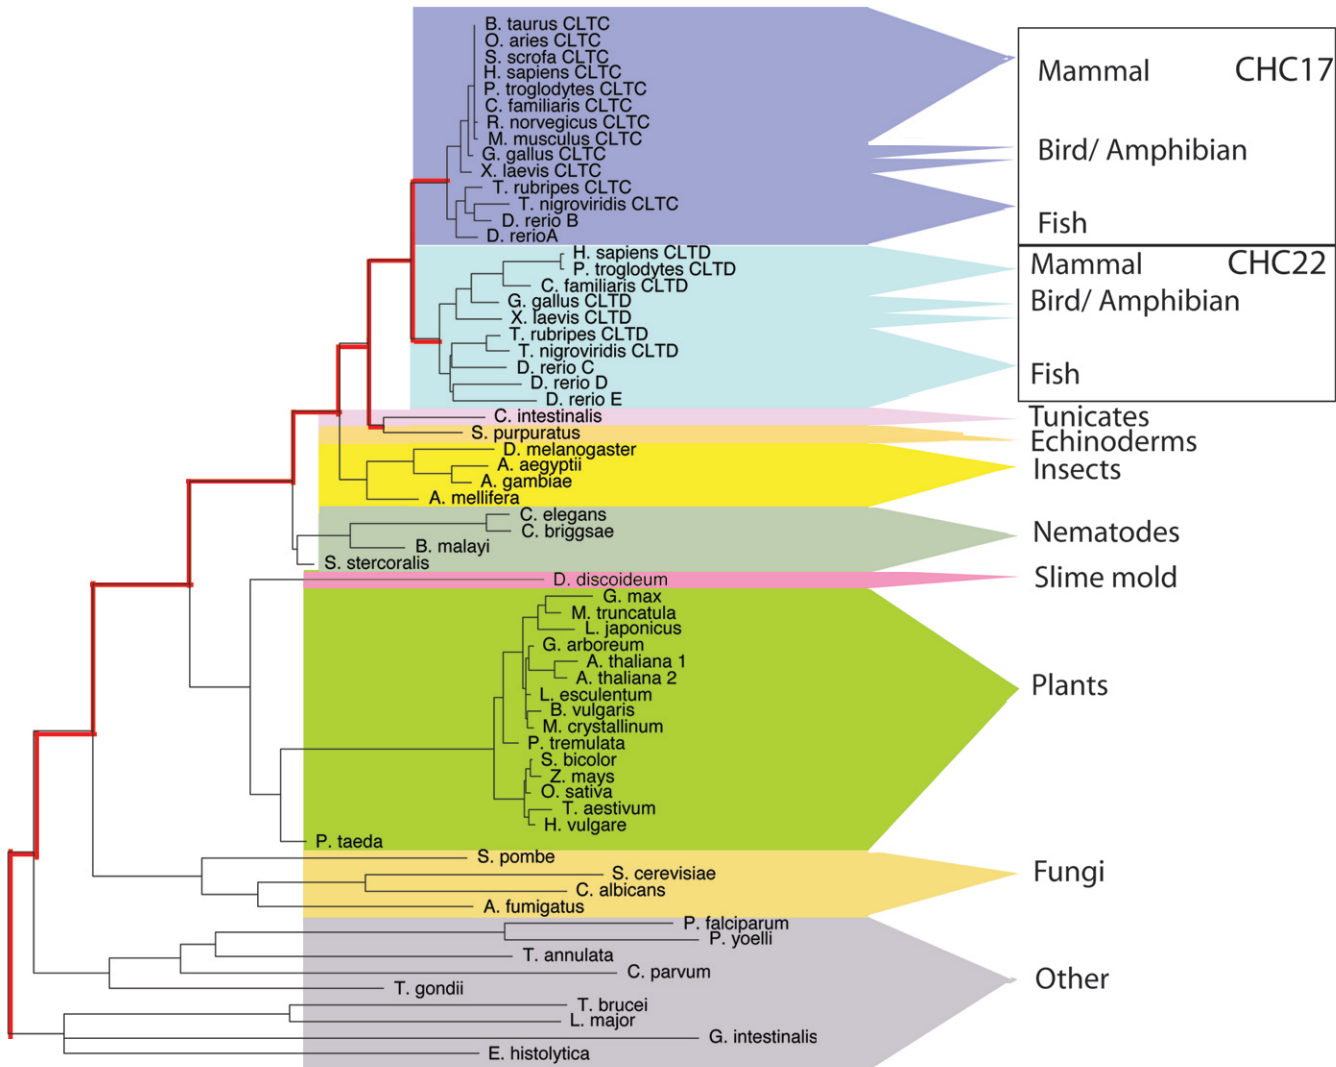

100 changes

Supplement: pnas_0502058102_6.pdf [file pnas_0502058102_6.pdf]

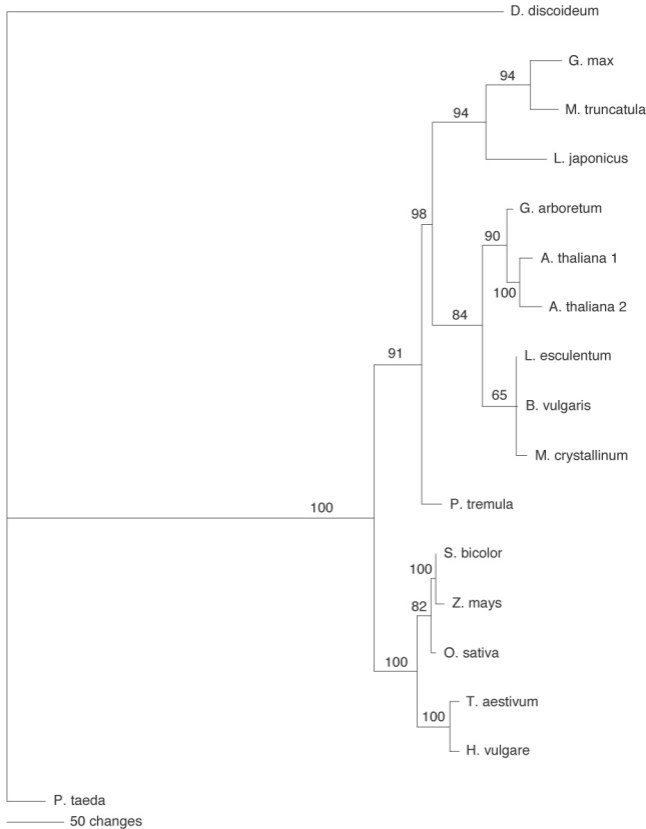

Supplement: pnas_0502058102_7.pdf [file pnas_0502058102_7.pdf]

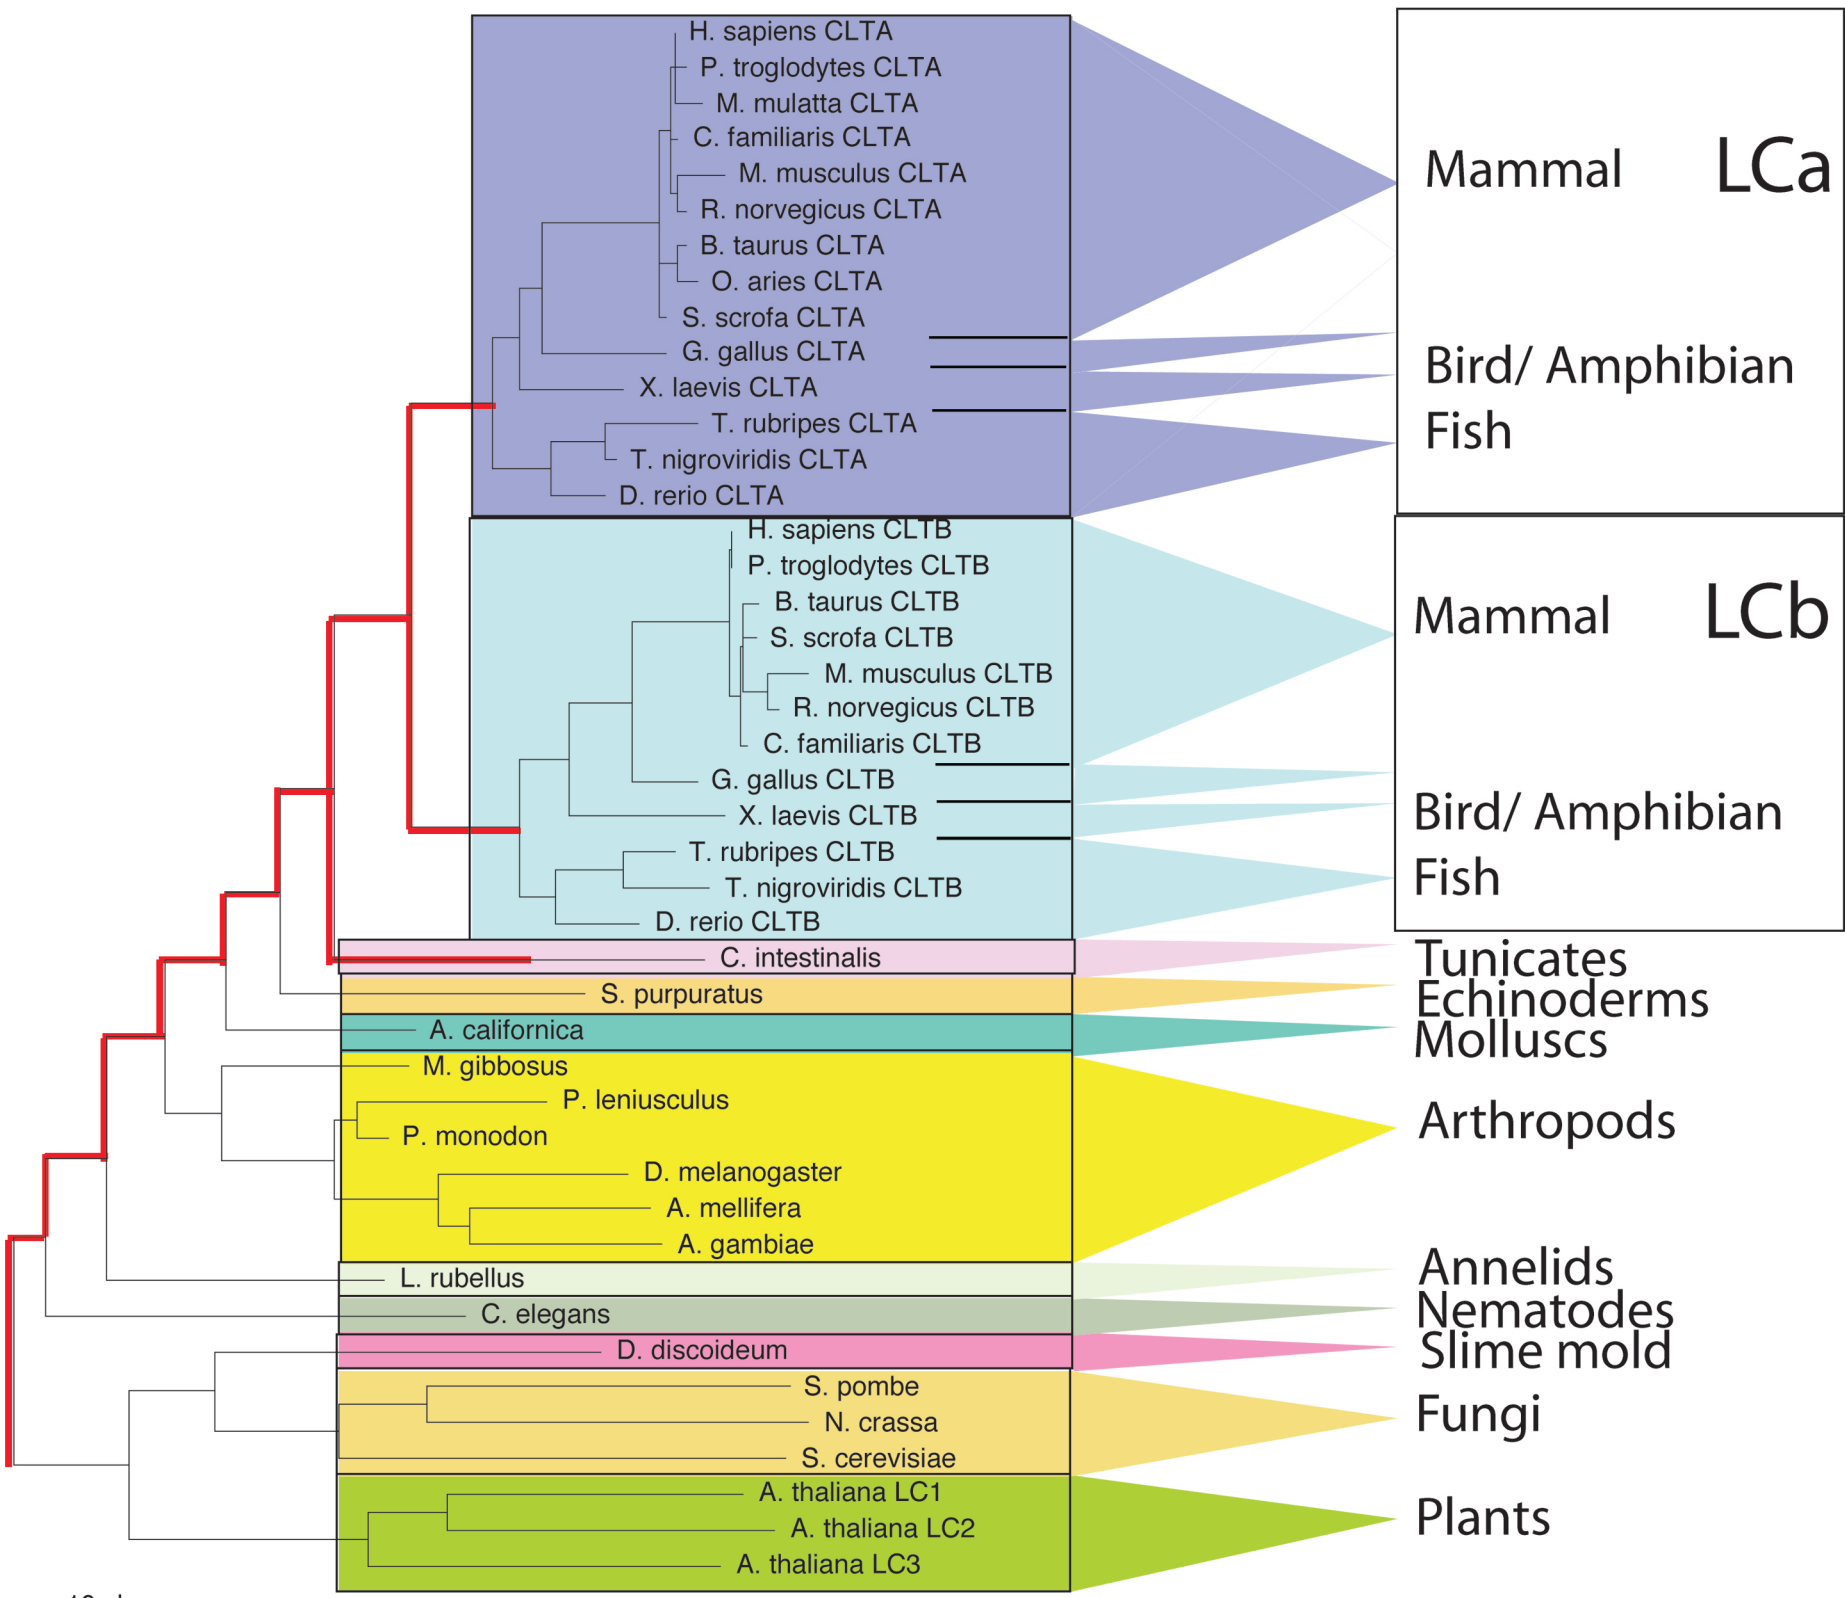

— 10 changes

Supplement: pnas_0502058102_8.pdf [file pnas_0502058102_8.pdf]
